# Supplementary material for: Prescription Psychoactive Medication Use in Adolescent Survivors of Childhood Cancer and Association With Adult Functional Outcomes
Source: PubMed Central journal article supplement — JNCI Cancer Spectr. 2020 Jun 29;4(5):pkaa057. doi: 10.1093/jncics/pkaa057 (PMC7583158; doi:10.1093/jncics/pkaa057), 2020-06-29
Supplement: pkaa057_supplementary_data.pdf [file pkaa057_supplementary_data.pdf]

## Supplementary Box 1: Medication Categories by AHFS Drug Classes

---

### Antidepressants

- 28:16.04.12 Monoamine Oxidase Inhibitors
- 28:16.04.16 Selective Serotonin and Norepinephrine Reuptake Inhibitors
- 28:16.04.20 Selective-Serotonin Reuptake Inhibitors
- 28:16.04.24 Serotonin Modulators
- 28:16.04.28 Tricyclics and Other Norepinephrine-Reuptake Inhibitors
- 28:16.04.92 Antidepressants, Miscellaneous

### Anxiolytics, Sedatives, Hypnotics

- 28:12.04 Barbiturates, Anticonvulsants
- 28:12.08 Benzodiazepines, Anticonvulsants
- 28:24.04 Barbiturates
- 28:24.08 Benzodiazepines
- 28:24.92 Anxiolytics, Sedatives, and Hypnotics, Miscellaneous

### Anticonvulsants

- 28:12.04 Barbiturates, Anticonvulsants
- 28:12.08 Benzodiazepines, Anticonvulsants
- 28:12.92 Anticonvulsants, Miscellaneous
- 28:12.20 Succinimides
- 28:12.12 Hydantoins

### Non-Opioid Analgesics

- 28:08.04.08 Cyclooxygenase-2 (COX-2) Inhibitors
- 28:08.04.92 Other Nonsteroidal Anti-inflammatory Agents
- 28:08.04.24 Salicylates
- 28:08.92 Analgesics and Antipyretics, Miscellaneous
- 28:32.28 Selective Serotonin Agonists

### Opioids

- 28:08.08 Opiate Agonists
- 28:08.12 Opiate Partial Agonists
- 28:10 Opiate Antagonists

### Muscle Relaxants

- 12:20.04 Centrally Acting Skeletal Muscle Relaxants
- 12:20.08 Direct-acting Skeletal Muscle Relaxants
- 12:20.12 GABA-derivative Skeletal Muscle Relaxants
- 12:20.20 Neuromuscular Blocking Agents
- 12:20.92 Skeletal Muscle Relaxants, Miscellaneous

### Neuroleptics

- 28:16.08.04 Atypical Antipsychotics
- 28:16.08.08 Butyrophenones
- 28:16.08.24 Phenothiazines
- 28:16.08.32 Thioxanthenes
- 28:16.08.92 Antipsychotics, Miscellaneous
- 28:28 Antimanic Agents

### Stimulants

- 28:20.92 Anorexigenic Agents and Respiratory and Cerebral Stimulants, Miscellaneous
- 28:20.04 Amphetamines
- 28:92 Central Nervous System Agents, Miscellaneous
- 24:08.16 Central Alpha-Agonists (for clonidine and guanfacine)
- 28:20.80 Wakefulness-promoting Agents (for Armodafinil)

Brinkman TM, Ullrich NJ, Zhang N, et al. Prevalence and predictors of prescription psychoactive medication use in adult survivors of childhood cancer: A report from the Childhood Cancer Survivor Study. *Journal of Cancer Survivorship*. 2013;7(1):104-114.

Brinkman TM, Zhang N, Ullrich NJ, et al: Psychoactive medication use and neurocognitive function in adult survivors of childhood cancer: A report from the childhood cancer survivor study. *Pediatric Blood & Cancer*. 2012;60:486-493

## Supplementary Tables

-Supplementary Table 1: Comparison between Survivors who Completed Self-evaluation of Functional Outcomes at Adulthood versus Survivors who did not Complete Self-evaluation†

| Clinical Characteristics              | Survivors with adult functional data | Survivors without adult functional data | <i>P</i> |
|---------------------------------------|--------------------------------------|-----------------------------------------|----------|
|                                       | (N=3114)<br>n (%)                    | (N=2551)<br>n (%)                       |          |
| Year of completion of baseline survey |                                      |                                         | <0.001   |
| 1992 - 1999                           | 2537 (60.7)                          | 1641 (39.3)                             |          |
| 2000 - 2009                           | 192 (47.9)                           | 229 (52.1)                              |          |
| 2010 - 2015                           | 385 (35.9)                           | 681 (64.1)                              |          |
| Sex                                   |                                      |                                         | <0.001   |
| Male                                  | 1536 (48.7)                          | 1511 (51.3)                             |          |
| Female                                | 1578 (59.5)                          | 1040 (40.5)                             |          |
| Race                                  |                                      |                                         | <0.001   |
| White/non-Hispanic                    | 2610 (56.5)                          | 1923 (43.5)                             |          |
| Others                                | 463 (43.4)                           | 554 (56.6)                              |          |
| Not specified                         | 41 (34.0)                            | 74 (66.0)                               |          |
| Health Insurance                      |                                      |                                         | <0.001   |
| Yes                                   | 2886 (59.3)                          | 1828 (40.7)                             |          |
| No                                    | 173 (51.6)                           | 143 (48.4)                              |          |
| Not specified                         | 41 (34.0)                            | 74 (66.0)                               |          |
| Household Income                      |                                      |                                         | <0.001   |
| < \$60,000                            | 1763 (52.1)                          | 1548 (47.9)                             |          |
| ≥\$60,000                             | 1198 (58.1)                          | 797 (41.9)                              |          |
| Not specified                         | 153 (41.8)                           | 206 (58.2)                              |          |
| History of epilepsy                   |                                      |                                         | <0.001   |
| No                                    | 2863 (54.6)                          | 2231 (45.4)                             |          |
| Yes                                   | 240 (44.2)                           | 311 (55.8)                              |          |
| History of migraine/headache          |                                      |                                         | 0.02     |
| No                                    | 2455 (54.4)                          | 1925 (45.6)                             |          |
| Yes                                   | 651 (51.0)                           | 618 (49.0)                              |          |
| Cancer-related Pain                   |                                      |                                         | 0.27     |
| No                                    | 2689 (59.8)                          | 1646 (40.2)                             |          |
| Mild                                  | 254 (55.7)                           | 189 (44.3)                              |          |
| Moderate                              | 109 (58.8)                           | 77 (41.2)                               |          |
| Severe                                | 37 (54.7)                            | 35 (45.3)                               |          |
| Diagnosis                             |                                      |                                         | <0.001   |
| Leukemia                              | 1300 (53.8)                          | 976 (46.2)                              |          |
| Central nervous system tumor          | 462 (51.0)                           | 444 (49.0)                              |          |
| Hodgkin Disease/Non-Hodgkin Lymphoma  | 148 (51.0)                           | 142 (49.0)                              |          |
| Wilms tumor                           | 518 (61.8)                           | 320 (38.2)                              |          |
| Neuroblastoma                         | 485 (52.2)                           | 445 (47.8)                              |          |
| Soft tissue sarcoma/ Osteosarcoma     | 201 (47.3)                           | 224 (52.7)                              |          |
| Age at Diagnosis (years) *            | 2.7 (1.5-4.2)                        | 2.8 (1.5-4.4)                           | <0.001   |
| Chemotherapy                          |                                      |                                         |          |
| Anthracyclines                        |                                      |                                         | 0.01     |
| Yes                                   | 1001 (60.4)                          | 657 (39.6)                              |          |

|                                                         |                |             |             |        |
|---------------------------------------------------------|----------------|-------------|-------------|--------|
|                                                         | No             | 1370 (64.3) | 760 (35.7)  |        |
| Alkylating Agent                                        |                |             |             | <0.001 |
|                                                         | Yes            | 1138 (58.0) | 823 (42.0)  |        |
|                                                         | No             | 1233 (67.5) | 595 (32.5)  |        |
| IV Methotrexate (cumulative) mg/m <sup>2</sup> Mean(SD) |                |             |             | 0.40   |
| IT Methotrexate (cumulative) mg/m <sup>2</sup> Mean(SD) |                |             |             | 0.23   |
| Anti-tumor Antibiotic                                   |                |             |             | 0.82   |
|                                                         | Yes            | 1300 (60.8) | 838 (39.2)  |        |
|                                                         | No             | 1239 (60.5) | 810 (39.5)  |        |
| Corticosteroids                                         |                |             |             | 0.21   |
|                                                         | Yes            | 1219 (59.7) | 824 (40.3)  |        |
|                                                         | No             | 1320 (61.6) | 824 (38.4)  |        |
| Enzymes                                                 |                |             |             | 0.43   |
|                                                         | Yes            | 1017 (61.4) | 640 (38.6)  |        |
|                                                         | No             | 1522 (60.2) | 1008 (39.8) |        |
| Epipodophyllotoxins                                     |                |             |             | 0.34   |
|                                                         | Yes            | 322 (60.8)  | 208 (39.2)  |        |
|                                                         | No             | 2049 (62.9) | 1207 (37.1) |        |
| Heavy Metals                                            |                |             |             | <0.001 |
|                                                         | Yes            | 163 (45.3)  | 197 (54.7)  |        |
|                                                         | No             | 2376 (62.1) | 1451 (37.9) |        |
| Plant Alkaloids                                         |                |             |             | 0.002  |
|                                                         | Yes            | 1868 (62.1) | 1139 (37.9) |        |
|                                                         | No             | 671 (56.9)  | 509 (43.1)  |        |
| Radiation                                               |                |             |             | <0.001 |
|                                                         | None           | 2007 (56.3) | 1439 (43.7) |        |
|                                                         | Brain <20 Gy   | 473 (58.5)  | 308 (41.5)  |        |
|                                                         | Brain 20-35 Gy | 153 (44.8)  | 177 (55.2)  |        |
|                                                         | Brain >35 Gy   | 275 (46.5)  | 316 (53.5)  |        |
| Body only (Chest, abdomen, pelvis) Radiation            |                |             |             | 0.02   |
|                                                         | No             | 2364 (54.5) | 1854 (45.5) |        |
|                                                         | Yes            | 750 (51.0)  | 697 (49.0)  |        |
| Psychoactive Medication Use in Adolescent               |                |             |             |        |
| Use of any psychoactive medication                      |                |             |             |        |
|                                                         | No             | 2614 (55.0) | 2014 (45.0) | <0.001 |
|                                                         | Yes            | 500 (47.7)  | 537 (52.3)  |        |
| Antidepressants                                         |                |             |             |        |
|                                                         | No             | 3028 (54.0) | 2453 (46.0) | 0.007  |
|                                                         | Yes            | 86 (44.7)   | 98 (55.3)   |        |
| Anxiolytics/sedatives/hypnotics                         |                |             |             |        |
|                                                         | No             | 3075 (53.7) | 2517 (46.3) | 0.92   |
|                                                         | Yes            | 39 (54.2)   | 34 (45.8)   |        |
| Anticonvulsants                                         |                |             |             |        |
|                                                         | No             | 2958 (54.2) | 2362 (45.8) | 0.001  |
|                                                         | Yes            | 156 (45.6)  | 189 (54.4)  |        |
| Non-opioid analgesics                                   |                |             |             |        |
|                                                         | No             | 3029 (53.5) | 2494 (46.5) | 0.23   |
|                                                         | Yes            | 85 (58.5)   | 57 (41.5)   |        |
| Opioids                                                 |                |             |             |        |
|                                                         | No             | 2972 (54.2) | 2371 (45.8) | <0.001 |

|                                 |     |             |             |        |
|---------------------------------|-----|-------------|-------------|--------|
|                                 | Yes | 142 (43.4)  | 180 (56.6)  |        |
| Muscle relaxants                | No  | 3102 (53.7) | 2540 (46.3) | 0.49   |
|                                 | Yes | 12 (46.8)   | 11 (53.2)   |        |
| Neuroleptics                    | No  | 3095 (53.9) | 2518 (46.1) | <0.001 |
|                                 | Yes | 19 (33.2)   | 33 (66.8)   |        |
| Stimulants                      | No  | 2996 (53.7) | 2446 (46.3) | 0.84   |
|                                 | Yes | 118 (53.1)  | 105 (46.9)  |        |
| Behavior Problems Index         |     |             |             |        |
| Depression/Anxiety              | No  | 2318 (58.6) | 1499 (41.4) | 0.71   |
|                                 | Yes | 575 (59.2)  | 365 (40.8)  |        |
| Headstrong Behavior             | No  | 2445 (59.6) | 1508 (40.4) | 0.001  |
|                                 | Yes | 446 (53.7)  | 356 (46.3)  |        |
| Attention Deficit               | No  | 2344 (59.1) | 1476 (40.9) | 0.19   |
|                                 | Yes | 546 (56.8)  | 389 (43.2)  |        |
| Peer Conflict/Social Withdrawal | No  | 1993 (59.0) | 1261 (41.0) | 0.44   |
|                                 | Yes | 897 (57.9)  | 603 (42.1)  |        |
| Antisocial                      | No  | 2450 (59.6) | 1513 (40.4) | 0.001  |
|                                 | Yes | 442 (53.8)  | 350 (46.2)  |        |
| Placement in special education  | No  | 1831 (54.6) | 1425 (45.4) | 0.05   |
|                                 | Yes | 1074 (52.0) | 950 (48.0)  |        |

† The demographics, treatment characteristics, psychoactive drug use at adolescence and behavior functioning (BPI) were compared between survivors who completed self-evaluation of adult functional outcomes at longitudinal follow-up *versus* survivors who did not complete self-evaluation. All statistical estimates from the data, including percentages, were calculated with sampling weights to account for under-sampling of survivors of acute lymphoblastic leukemia diagnosed from 1987-1999.

\* Presented as median (interquartile range)

Supplementary Table 2: Comparison of Psychoactive Medication Use in Survivors vs Sibling Controls

| Use of psychoactive medications | Survivors<br>(N=5665) | Siblings<br>(N=921) |                   |
|---------------------------------|-----------------------|---------------------|-------------------|
|                                 | (%)                   | (%)                 | RR (95%CI)        |
| Any psychoactive medication     | 1037 (18.3)           | 61 (6.6)            | 2.97 (2.27- 3.89) |
| By each medication class:       |                       |                     |                   |
| Antidepressants                 | 184 (3.2)             | 13 (1.4)            | 2.64 (1.42- 4.92) |
| Anxiolytics/sedatives/hypnotics | 73 (1.3)              | 1 (0.1)             | *                 |
| Anticonvulsants                 | 345 (6.1)             | 8 (0.9)             | 8.69 (3.84-19.65) |
| Non-opioid analgesics           | 142 (2.5)             | 8 (0.9)             | 2.32 (1.15- 4.71) |
| Opioids                         | 322 (5.7)             | 16 (1.7)            | 2.72 (1.65- 4.50) |
| Muscle relaxants                | 23 (0.4)              | 2 (0.2)             | *                 |
| Neuroleptics                    | 52 (0.9)              | 5 (0.5)             | *                 |
| Stimulants                      | 223 (3.9)             | 21 (2.3)            | 2.58 (1.50- 4.45) |

Models are adjusted for sex, age and race

\* Risk comparisons were not conducted for Anxiolytics/Sedatives/Hypnotics, Muscle Relaxants and Neuroleptics due to limited sample size within the sibling group.

Supplementary Table 3: Proportion of Survivors and Siblings who Reported Psychoactive Medications Use by Baseline Survey Era<sup>†</sup>

| Baseline Survey Era             | Groups    | 1992 – 1999<br>(n=4178) |        | 2000 – 2009<br>(n=421) |        | 2010 – 2015<br>(n=1066) |        |
|---------------------------------|-----------|-------------------------|--------|------------------------|--------|-------------------------|--------|
|                                 |           | n                       | (%)    | n                      | (%)    | n                       | (%)    |
| Any psychoactive drug           | Survivors | 740                     | (17.7) | 102                    | (22.7) | 195                     | (17.1) |
|                                 | Siblings  | 49                      | (6.3)  | 0                      | (0)    | 12                      | (11.2) |
| By categories:                  |           |                         |        |                        |        |                         |        |
| Antidepressants                 | Survivors | 83                      | (2.0)  | 34                     | (7.2)  | 67                      | (5.8)  |
|                                 | Siblings  | 10                      | (1.3)  | 0                      | (0)    | 3                       | (2.8)  |
| Anxiolytics/sedatives/hypnotics | Survivors | 48                      | (1.1)  | 9                      | (2.4)  | 16                      | (1.8)  |
|                                 | Siblings  | 0                       | (0)    | 0                      | (0)    | 1                       | (0.9)  |
| Anticonvulsants                 | Survivors | 247                     | (5.9)  | 37                     | (8.1)  | 61                      | (5.2)  |
|                                 | Siblings  | 6                       | (0.8)  | 0                      | (0)    | 2                       | (1.9)  |
| Non-opioid analgesics           | Survivors | 116                     | (2.8)  | 4                      | (0.6)  | 22                      | (2.1)  |
|                                 | Siblings  | 8                       | (1.0)  | 0                      | (0)    | 0                       | (0)    |
| Opioids                         | Survivors | 295                     | (7.1)  | 10                     | (1.4)  | 17                      | (1.6)  |
|                                 | Siblings  | 16                      | (2.0)  | 0                      | (0)    | 0                       | (0)    |
| Muscle relaxants                | Survivors | 17                      | (0.4)  | 1                      | (0.1)  | 5                       | (0.5)  |
|                                 | Siblings  | 2                       | (0.3)  | 0                      | (0)    | 0                       | (0)    |
| Neuroleptics                    | Survivors | 25                      | (0.6)  | 6                      | (1.6)  | 21                      | (2.0)  |
|                                 | Siblings  | 4                       | (0.5)  | 0                      | (0)    | 1                       | (0.9)  |
| Stimulants                      | Survivors | 112                     | (2.7)  | 39                     | (9.4)  | 72                      | (5.6)  |
|                                 | Siblings  | 13                      | (1.7)  | 0                      | (0)    | 8                       | (7.5)  |

<sup>†</sup> Percentages calculated on total number of participants for whom data was available and weighted to reflect modified sampling of survivors in expansion cohort.

Supplementary Table 4: Factors Associated with Psychoactive Medication Use in Adolescent Survivors of Childhood Cancer

| Associated Factors                        | Any Psychoactive Medication |           | Antidepressant |           | Anxiolytics/ sedatives/ hypnotics |           | Anticonvulsants |           | Non-opioid analgesics |           | Opioids |           | Muscle relaxants |           | Neuroleptics |           | Stimulants |           |
|-------------------------------------------|-----------------------------|-----------|----------------|-----------|-----------------------------------|-----------|-----------------|-----------|-----------------------|-----------|---------|-----------|------------------|-----------|--------------|-----------|------------|-----------|
|                                           | RR                          | 95% CI    | RR             | 95% CI    | RR                                | 95% CI    | RR              | 95% CI    | RR                    | 95% CI    | RR      | 95% CI    | RR               | 95% CI    | RR           | 95% CI    | RR         | 95% CI    |
| Demographics factors†                     |                             |           |                |           |                                   |           |                 |           |                       |           |         |           |                  |           |              |           |            |           |
| Sex                                       |                             |           |                |           |                                   |           |                 |           |                       |           |         |           |                  |           |              |           |            |           |
| Female (vs male)                          | 0.94                        | 0.82-1.08 | 1.13           | 0.81-1.58 | 1.17                              | 0.63-2.20 | 1.03            | 0.79-1.35 | 1.35                  | 0.94-1.94 | 1.08    | 0.82-1.41 | 1.24             | 0.46-3.32 | 0.84         | 0.41-1.71 | 0.59       | 0.43-0.80 |
| Race                                      |                             |           |                |           |                                   |           |                 |           |                       |           |         |           |                  |           |              |           |            |           |
| Others (vs White/non-Hispanic)            | 0.76                        | 0.63-0.92 | 0.52           | 0.32-0.84 | 0.64                              | 0.27-1.50 | 0.78            | 0.56-1.10 | 1.24                  | 0.80-1.94 | 0.67    | 0.45-1.02 | 1                | 0.17-5.96 | 1.36         | 0.57-3.28 | 0.43       | 0.25-0.71 |
| Age at baseline (years)                   | 1                           | 0.97-1.04 | 1.13           | 1.04-1.22 | 1.02                              | 0.86-1.20 | 0.97            | 0.91-1.03 | 1.01                  | 0.92-1.10 | 1       | 0.94-1.07 | 1.14             | 0.92-1.42 | 1            | 0.85-1.18 | 0.94       | 0.88-1.01 |
| Age at diagnosis (years)                  | 1                           | 0.97-1.04 | 1.04           | 0.95-1.15 | 1.07                              | 0.92-1.25 | 0.94            | 0.87-1.01 | 1.04                  | 0.94-1.14 | 1.06    | 0.99-1.15 | 1.12             | 0.93-1.36 | 1.24         | 1.00-1.53 | 0.96       | 0.87-1.05 |
| Socioeconomic factors†                    |                             |           |                |           |                                   |           |                 |           |                       |           |         |           |                  |           |              |           |            |           |
| Health insurance                          |                             |           |                |           |                                   |           |                 |           |                       |           |         |           |                  |           |              |           |            |           |
| Yes (vs none)                             | 1.07                        | 0.80-1.43 | 1.47           | 0.73-2.94 | 0.22                              | 0.03-1.55 | 0.59            | 0.31-1.12 | 1.73                  | 1.00-3.01 | 0.91    | 0.53-1.57 | 1.39             | 0.36-5.41 | 1.38         | 0.49-3.95 | 0.99       | 0.47-2.08 |
| Household income < \$60000 (vs ≥\$60,000) | 1.29                        | 1.07-1.56 | 1.33           | 0.79-2.22 | 1.47                              | 0.67-3.24 | 1.31            | 0.92-1.87 | 1.22                  | 0.77-1.92 | 1.88    | 1.34-2.65 | 1.4              | 0.41-4.75 | 1.53         | 0.56-4.16 | 0.84       | 0.54-1.30 |
| Cancer diagnosis *                        |                             |           |                |           |                                   |           |                 |           |                       |           |         |           |                  |           |              |           |            |           |
| Leukemia (vs others)                      | 1                           | 0.84-1.18 | 0.64           | 0.43-0.96 | 2.08                              | 0.97-4.49 | 1.51            | 0.97-2.35 | 1.04                  | 0.69-1.55 | 0.89    | 0.66-1.20 | 1.37             | 0.46-4.10 | 0.63         | 0.29-1.36 | 0.78       | 0.55-1.11 |
| CNS tumor (vs others)                     | 2.21                        | 1.91-2.57 | 1.31           | 0.90-1.90 | 4                                 | 2.01-7.94 | 9.11            | 6.66-12.5 | 1.09                  | 0.64-1.86 | 1.44    | 1.01-2.05 | 2.26             | 0.66-7.74 | 0.64         | 0.26-1.54 | 1.2        | 0.85-1.70 |
| Chemotherapy ‡                            |                             |           |                |           |                                   |           |                 |           |                       |           |         |           |                  |           |              |           |            |           |
| IV MTX (per 10mg/m <sup>2</sup> )         | 1                           | 1.00-1.00 | 1              | 1.00-1.00 | 1                                 | 1.00-1.00 | 1               | 1.00-1.00 | 1                     | 1.00-1.00 | 1       | 1.00-1.00 | ††               |           | 1            | 1.00-1.00 | 1          | 1.00-1.00 |
| IT MTX (per 100mg/m <sup>2</sup> )        | 0.98                        | 0.92-1.04 | 0.8            | 0.67-0.95 | 1.18                              | 1.01-1.38 | 1.05            | 0.92-1.21 | 0.92                  | 0.80-1.07 | 0.89    | 0.79-1.00 | ††               |           | 0.82         | 0.61-1.10 | 1.03       | 0.93-1.14 |
| Cranial Radiation ‡                       |                             |           |                |           |                                   |           |                 |           |                       |           |         |           |                  |           |              |           |            |           |
| CRT <20 Gy (vs none)                      | 0.90                        | 0.71-1.12 | 0.80           | 0.44-1.44 | 0.65                              | 0.28-1.54 | 0.57            | 0.33-1.00 | 1.69                  | 1.05-2.73 | 1.28    | 0.85-1.93 | ††               |           | 0.96         | 0.35-2.58 | 0.48       | 0.28-0.81 |
| CRT 20-35 Gy (vs none)                    | 1.20                        | 0.84-1.71 | 1.06           | 0.42-2.68 | 0.18                              | 0.01-2.65 | 0.76            | 0.34-1.71 | 1.79                  | 0.86-3.73 | 1.04    | 0.50-2.14 | ††               |           | 0.47         | 0.06-3.64 | 1          | 0.42-2.36 |
| CRT >35 Gy (vs none)                      | 1.96                        | 1.64-2.33 | 0.78           | 0.46-1.31 | 2.02                              | 0.99-4.11 | 5.36            | 4.01-7.18 | 1.49                  | 0.83-2.68 | 1.64    | 1.09-2.48 | ††               |           | 0.82         | 0.31-2.22 | 1.16       | 0.74-1.81 |
| Seizures §                                |                             |           |                |           |                                   |           |                 |           |                       |           |         |           |                  |           |              |           |            |           |
| Yes (vs none)                             | 4.03                        | 3.57-4.55 | 1.98           | 1.34-2.92 | 6.65                              | 3.73-11.9 | 43.66           | 32.1-59.4 | 1.34                  | 0.78-2.29 | 1.3     | 0.88-1.93 | 1.31             | 0.28-6.27 | 3.41         | 1.56-7.47 | 1.75       | 1.20-2.56 |
| Pain §                                    |                             |           |                |           |                                   |           |                 |           |                       |           |         |           |                  |           |              |           |            |           |
| Headache/migraine                         |                             |           |                |           |                                   |           |                 |           |                       |           |         |           |                  |           |              |           |            |           |
| Yes (vs none)                             | 1.53                        | 1.34-1.75 | 1.94           | 1.42-2.65 | 1.23                              | 0.64-2.36 | 1.14            | 0.90-1.44 | 2.83                  | 1.97-4.06 | 2.37    | 1.76-3.19 | 0.53             | 0.15-1.91 | 1.14         | 0.56-2.31 | 1.13       | 0.82-1.58 |
| Cancer related bodily pain                |                             |           |                |           |                                   |           |                 |           |                       |           |         |           |                  |           |              |           |            |           |
| Mild (vs none)                            | 1.44                        | 1.18-1.77 | 1.24           | 0.77-1.99 | 3.31                              | 1.42-7.71 | 1.26            | 0.88-1.79 | 1.62                  | 0.89-2.96 | 2.19    | 1.50-3.19 | 2.38             | 0.63-8.96 | 1.13         | 0.41-3.13 | 1.41       | 0.86-2.31 |
| Moderate (vs none)                        | 1.99                        | 1.60-2.47 | 2.55           | 1.48-4.38 | 3.49                              | 1.38-8.83 | 1.46            | 1.04-2.05 | 3.53                  | 2.08-5.99 | 2.57    | 1.59-4.16 | 6.5              | 2.01-21.0 | 3.33         | 0.94-11.8 | 0.89       | 0.42-1.90 |
| Severe (vs none)                          | 2.36                        | 1.75-3.18 | 2.51           | 1.02-6.20 | 8.01                              | 2.83-22.7 | 2.21            | 1.35-3.59 | 4.11                  | 2.05-8.23 | 4.14    | 2.38-7.20 | 13.41            | 2.25-79.8 | 1.41         | 0.20-10.0 | 0.96       | 0.30-3.05 |



† Outcomes were analyzed adjusting for demographic and socioeconomic variables

\* Outcomes are analyzed adjusted for demographic and socioeconomic variables and cancer diagnoses

‡ Outcomes are analyzed adjusted for demographic and socioeconomic variables and treatment variables

§ Outcomes are analyzed adjusted for demographic and socioeconomic variables, seizure and pain

†† Risk comparisons for the use of Muscle Relaxants were not conducted for treatment variables due to limited sample size.

Supplementary Table 5: Pattern of Reported Psychoactive Medication Use from Adolescence (baseline) to Adulthood (follow-up) Among Survivors (N=3193) †

| Use of psychoactive medication  | Persistent users* |       | New-onset users |        | Former users |       | Non-users |        |
|---------------------------------|-------------------|-------|-----------------|--------|--------------|-------|-----------|--------|
|                                 | n                 | %     | n               | %      | n            | %     | n         | %      |
| Any psychoactive medication     | 250               | (7.9) | 479             | (14.8) | 264          | (8.3) | 2200      | (69.1) |
| By categories:                  |                   |       |                 |        |              |       |           |        |
| Antidepressants                 | 36                | (1.3) | 349             | (10.7) | 51           | (1.5) | 2757      | (86.4) |
| Anxiolytics/Sedatives/Hypnotics | 8                 | (0.4) | 55              | (1.7)  | 33           | (1.1) | 3097      | (96.8) |
| Anticonvulsants                 | 101               | (3.1) | 119             | (3.5)  | 61           | (2.0) | 2912      | (91.4) |
| Non-Opioid                      | 10                | (0.4) | 72              | (2.1)  | 75           | (2.2) | 3036      | (95.3) |
| Opioids                         | 11                | (0.3) | 73              | (2.1)  | 131          | (3.8) | 2978      | (93.8) |
| Muscle relaxant                 | 4                 | (0.1) | 21              | (0.6)  | 8            | (0.2) | 3160      | (99.0) |
| Neuroleptics                    | 3                 | (0.1) | 40              | (1.2)  | 16           | (0.5) | 3134      | (98.1) |
| Stimulants                      | 43                | (1.4) | 63              | (2.1)  | 82           | (2.7) | 3005      | (93.7) |

† Percentages calculated on total number of participants for whom data was available and weighted to reflect modified sampling of survivors in expansion cohort.

\* Persistent users: Survivors with reported use of psychoactive medication at both adolescence and young adulthood

‡ New-onset users: Survivors with no reported use of psychoactive medication at adolescence but reported use at young adulthood

§ Former users: Survivors with reported use of psychoactive medication at adolescence but did not report use at young adulthood

†† Non-users: Survivors with no reported use of psychoactive medication at both adolescence and young adulthood

Supplementary Table 6: Association between the Use of Psychoactive Medications at Adolescence and Emotional Distress at Adulthood Among Survivors

| Use of psychoactive medication        | Anxiety*         | Depression*      | Somatization*    | Post-traumatic Symptoms† |
|---------------------------------------|------------------|------------------|------------------|--------------------------|
|                                       | RR (95% CI) ‡            |
| Any psychoactive medication (overall) | 1.05 (0.74-1.50) | 0.95 (0.68-1.32) | 1.22 (0.85-1.75) | 1.05 (0.77-1.44)         |
| By categories:                        |                  |                  |                  |                          |
| Antidepressants                       | 0.84 (0.42-1.70) | 1.28 (0.78-2.09) | 0.67 (0.33-1.39) | 1.43 (0.85-2.41)         |
| Anxiolytics/sedatives/hypnotics       | 0.32 (0.05-2.22) | 0.70 (0.22-2.17) | 0.61 (0.15-2.56) | 0.38 (0.05-2.63)         |
| Anticonvulsants                       | 0.61 (0.27-1.37) | 0.61 (0.32-1.15) | 0.86 (0.46-1.62) | 1.06 (0.61-1.83)         |
| Non-opioid analgesics                 | 1.56 (0.87-2.79) | 1.05 (0.57-1.93) | 1.71 (0.84-3.51) | 0.95 (0.50-1.81)         |
| Opioids                               | 1.06 (0.56-2.01) | 1.24 (0.76-2.01) | 1.72 (1.09-2.73) | 1.14 (0.70-1.85)         |
| Muscle relaxants                      | 1.13 (0.21-6.14) | 0.96 (0.16-5.64) | 3.22 (1.25-8.33) | 1.98 (0.63-6.23)         |
| Neuroleptics                          | 1.40 (0.46-4.33) | 1.07 (0.35-3.26) | 0.42 (0.06-2.83) | 2.13 (1.01-4.51)         |
| Stimulants                            | 1.14 (0.65-2.00) | 1.23 (0.71-2.12) | 0.94 (0.50-1.78) | 0.70 (0.34-1.47)         |

\* Distress will be defined as T-scores  $\geq 63$  (90th percentile) for each subscale within the Brief Symptom Inventory (BSI)

† An overall positive endorsement of post-traumatic symptoms was defined by the report of at least one re-experiencing symptom, at least three avoidance symptoms and at least two arousal symptoms.

‡ Relative risks (RR) and 95% confidence intervals (CI) from multivariable models are adjusted for age, sex and race, intravenous and intrathecal methotrexate doses, and cranial radiation dose; and presence of depression/anxiety problems during adolescence

Supplementary Table 7: Association between the Use of Psychoactive Medications at Adolescence and Health-related Quality of Life at Adulthood Among Survivors

| Use of psychoactive medication      | Performance Function* | Role Physical*   | Bodily Pain*     | General Health*  | Vitality*        | Social Functioning* | Role Emotional*  | Mental Health*   |
|-------------------------------------|-----------------------|------------------|------------------|------------------|------------------|---------------------|------------------|------------------|
|                                     | RR (95% CI) †         | RR (95% CI) †    | RR (95% CI) †    | RR (95% CI) †    | RR (95% CI) †    | RR (95% CI) †       | RR (95% CI) †    | RR (95% CI) †    |
| Any psychoactive medication         | 3.13 (2.35-4.18)      | 1.90 (1.43-2.53) | 1.53 (1.17-1.99) | 1.43 (1.14-1.80) | 1.35 (1.09-1.67) | 1.53 (1.18-1.98)    | 0.98 (0.77-1.25) | 0.96 (0.74-1.25) |
| By categories:                      |                       |                  |                  |                  |                  |                     |                  |                  |
| Antidepressants                     | 2.17 (1.32-3.57)      | 2.29 (1.47-3.56) | 1.48 (0.92-2.38) | 1.59 (1.06-2.36) | 1.30 (0.86-1.97) | 2.02 (1.39-2.93)    | 1.53 (1.03-2.26) | 1.04 (0.61-1.77) |
| Anxiolytics/sedatives/<br>Hypnotics | 6.55 (3.74-11.48)     | 4.17 (2.30-7.55) | 2.14 (1.21-3.77) | 1.32 (0.66-2.67) | 0.61 (0.22-1.66) | 2.81 (1.72-4.58)    | 0.94 (0.45-2.00) | 1.24 (0.62-2.50) |
| Anticonvulsants                     | 3.41 (2.31-5.05)      | 2.25 (1.45-3.49) | 1.18 (0.76-1.81) | 1.13 (0.78-1.65) | 1.08 (0.74-1.58) | 2.03 (1.40-2.95)    | 0.98 (0.65-1.49) | 1.04 (0.68-1.59) |
| Non-opioid analgesics               | 1.27 (0.64-2.52)      | 1.67 (1.00-2.80) | 2.15 (1.36-3.38) | 1.58 (1.01-2.48) | 1.70 (1.19-2.42) | 1.22 (0.70-2.14)    | 1.20 (0.77-1.86) | 0.92 (0.53-1.58) |
| Opioids                             | 2.47 (1.70-3.59)      | 1.62 (1.05-2.49) | 1.99 (1.44-2.74) | 1.71 (1.27-2.30) | 1.70 (1.29-2.26) | 1.37 (0.96-1.96)    | 1.03 (0.69-1.53) | 1.22 (0.83-1.80) |
| Muscle relaxants                    | 3.75 (1.18-11.95)     | 0.95 (0.15-6.07) | 3.19 (1.80-5.66) | 0.97 (0.27-3.47) | 1.50 (0.67-3.40) | 1.16 (0.35-3.83)    | 1.13 (0.32-4.04) | 0.55 (0.09-3.30) |
| Neuroleptics                        | 1.70 (0.60-4.81)      | 0.85 (0.22-3.35) | 2.40 (1.29-4.48) | 0.91 (0.32-2.56) | 0.88 (0.35-2.21) | 2.09 (1.19-3.69)    | 1.17 (0.48-2.85) | 0.94 (0.35-2.56) |
| Stimulants                          | 1.86 (1.18-2.96)      | 1.43 (0.89-2.29) | 0.82 (0.49-1.37) | 0.78 (0.50-1.23) | 1.26 (0.87-1.81) | 0.82 (0.52-1.30)    | 0.84 (0.54-1.31) | 0.98 (0.65-1.46) |

\* Impairment is defined as scores falling below a T-score of 40 (1 standard deviation below the mean)

† Relative risk (RRs) and 95% confidence intervals (CIs) from multivariable models are adjusted for age, sex and race; intravenous and intrathecal methotrexate doses, and cranial radiation dose; presence of depression/anxiety, peer conflict/social withdrawal and antisocial problems during adolescence.

Supplementary Table 8: Characteristics and Social Attainment Outcomes of Adult Survivors of Childhood Cancer who were >25 Years of Age during Follow-up

| Clinical Characteristics              |                                      | N=585<br>n (%)   |
|---------------------------------------|--------------------------------------|------------------|
| Year of completion of baseline survey |                                      |                  |
|                                       | 1992 – 1999                          | 579 (99.0)       |
|                                       | 2000 – 2009                          | 6 (1.0)          |
| Age at diagnosis (years) *            |                                      | 2.62 (1.43-3.81) |
| Age at baseline (years) *             |                                      | 17 (17-18)       |
| Age at Follow-up (years) *            |                                      | 25 (25-26)       |
| Sex                                   |                                      |                  |
|                                       | Male                                 | 305 (52.1)       |
|                                       | Female                               | 280 (47.9)       |
| Race                                  |                                      |                  |
|                                       | White/non-Hispanic                   | 489 (83.6)       |
|                                       | Others                               | 93 (15.9)        |
|                                       | Not specified                        | 3 (0.5)          |
| Health Insurance                      |                                      |                  |
|                                       | Yes                                  | 538 (92.0)       |
|                                       | No                                   | 37 (6.3)         |
|                                       | Not specified                        | 10 (1.7)         |
| Household Income                      |                                      |                  |
|                                       | < \$60,000                           | 338 (57.8)       |
|                                       | ≥\$60,000                            | 212 (36.2)       |
|                                       | Not specified                        | 35 (6.0)         |
| Diagnosis                             |                                      |                  |
|                                       | Leukemia                             | 254 (43.4)       |
|                                       | Central nervous system tumor         | 66 (11.3)        |
|                                       | Hodgkin Disease/Non-Hodgkin Lymphoma | 55 (9.4)         |
|                                       | Wilms tumor                          | 98 (16.8)        |
|                                       | Neuroblastoma                        | 63 (10.8)        |
|                                       | Soft tissue sarcoma/ Osteosarcoma    | 49 (8.4)         |
| Social Attainment Outcomes            |                                      |                  |
| Highest Education Attainment          |                                      |                  |
|                                       | Below college graduate               | 354 (60.5)       |
|                                       | College graduate and above           | 230 (39.3)       |
|                                       | Not specified                        | 1 (0.2)          |
| Employment status                     |                                      |                  |
|                                       | full time Employed                   | 393 (67.2)       |
|                                       | Not full time Employed               | 192 (32.8)       |

\* Presented as median (interquartile range)

Supplementary Table 9: Association between Psychoactive Medication Use at Adolescence and Social Attainment during Adulthood Among Survivors†

| Use of psychoactive medication  | Education attainment   | Employment status      |
|---------------------------------|------------------------|------------------------|
|                                 | Below College Graduate | Not Employed Full-time |
|                                 | RR 95% CI *            | RR 95% CI *            |
| Any psychoactive medication     | 1.21 (1.04-1.41)       | 1.60 (1.23-2.08)       |
| By categories:                  |                        |                        |
| Antidepressants                 | 1.35 (0.93-1.96)       | 1.34 (0.75-2.40)       |
| Anxiolytics/sedatives/hypnotics | 1.66 (1.27-2.15)       | 1.66 (0.76-3.62)       |
| Anticonvulsants                 | 1.18 (0.97-1.45)       | 2.15 (1.60-2.89)       |
| Non-opioid analgesics           | 1.13 (0.82-1.55)       | 1.06 (0.52-2.13)       |
| Opioids                         | 1.24 (1.00-1.53)       | 1.34 (0.85-2.12)       |
| Muscle relaxants                | 1.45 (1.27-1.65)       | ‡                      |
| Neuroleptics                    | 1.02 (0.62-1.69)       | 1.68 (0.92-3.08)       |
| Stimulants                      | 1.38 (0.89-2.14)       | 2.79 (1.77-4.40)       |

† This analysis on social attainment was conducted in the subgroup of survivors who were above the age of 25 years old during the follow-up surveys

\* Relative risks (RRs) and 95% confidence intervals (CIs) from multivariable models adjusted for sex, age and race, socioeconomic status, intravenous and intrathecal methotrexate doses, and cranial radiation dose

‡ Risk comparisons were not conducted for Muscle Relaxants to limited sample size.

Supplementary Figure 1: Flow Diagram of Study participation of Survivors from the Childhood Cancer Survivor Study

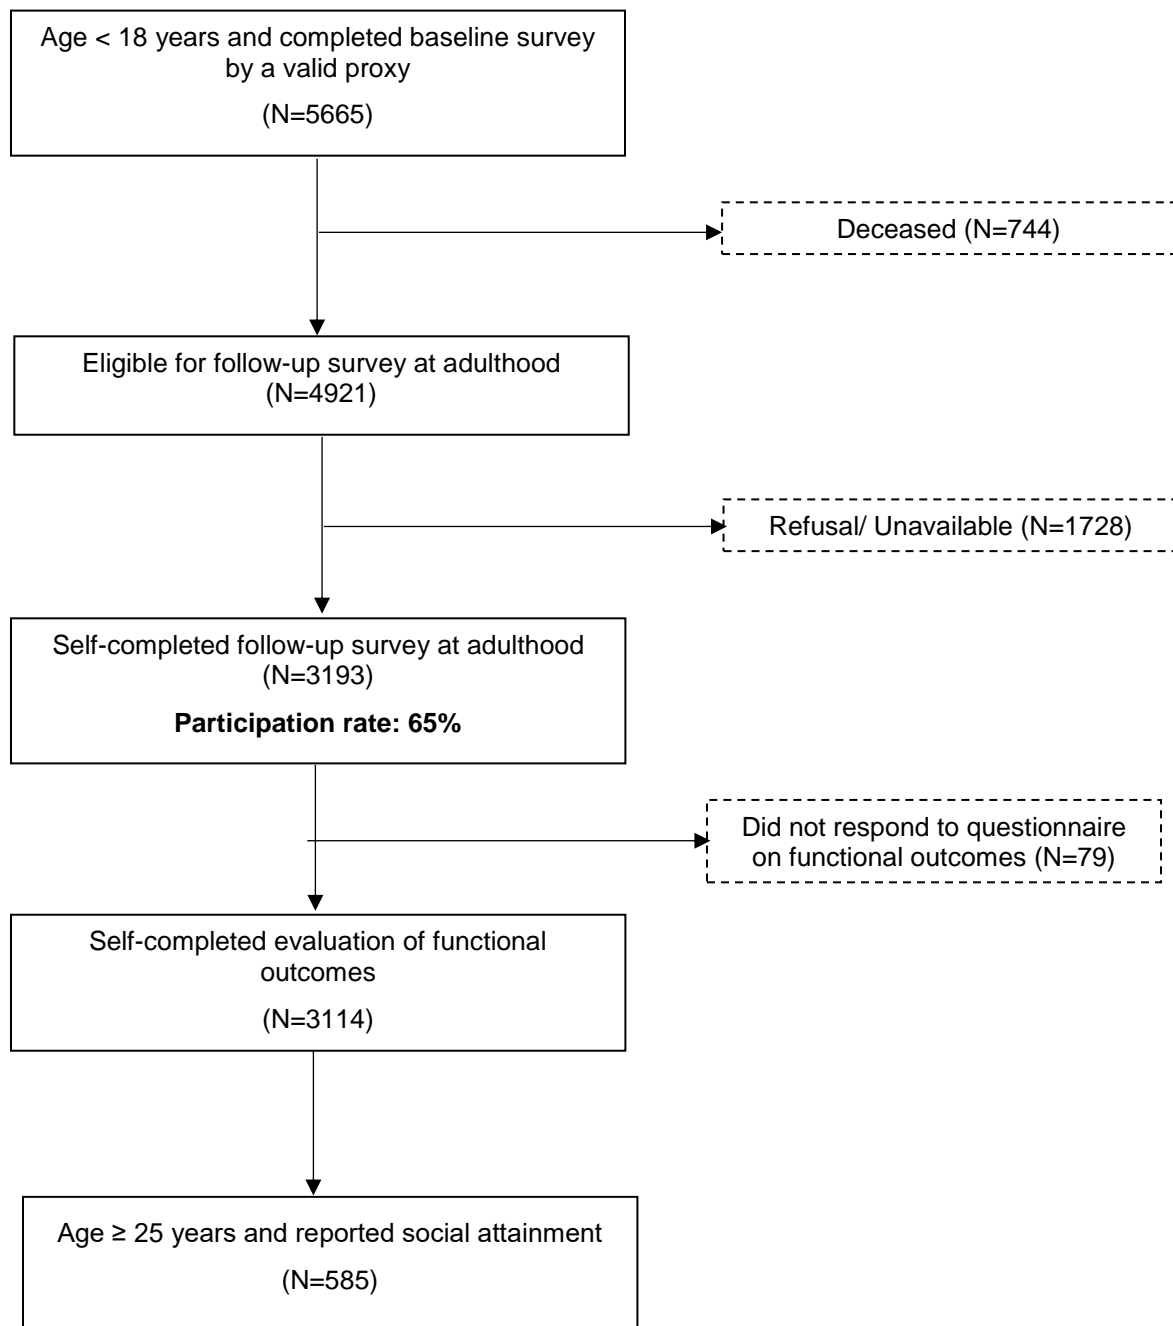

Supplementary Figure 2: Comparison of Psychoactive Medication Use in Survivors vs Sibling Controls by Diagnoses

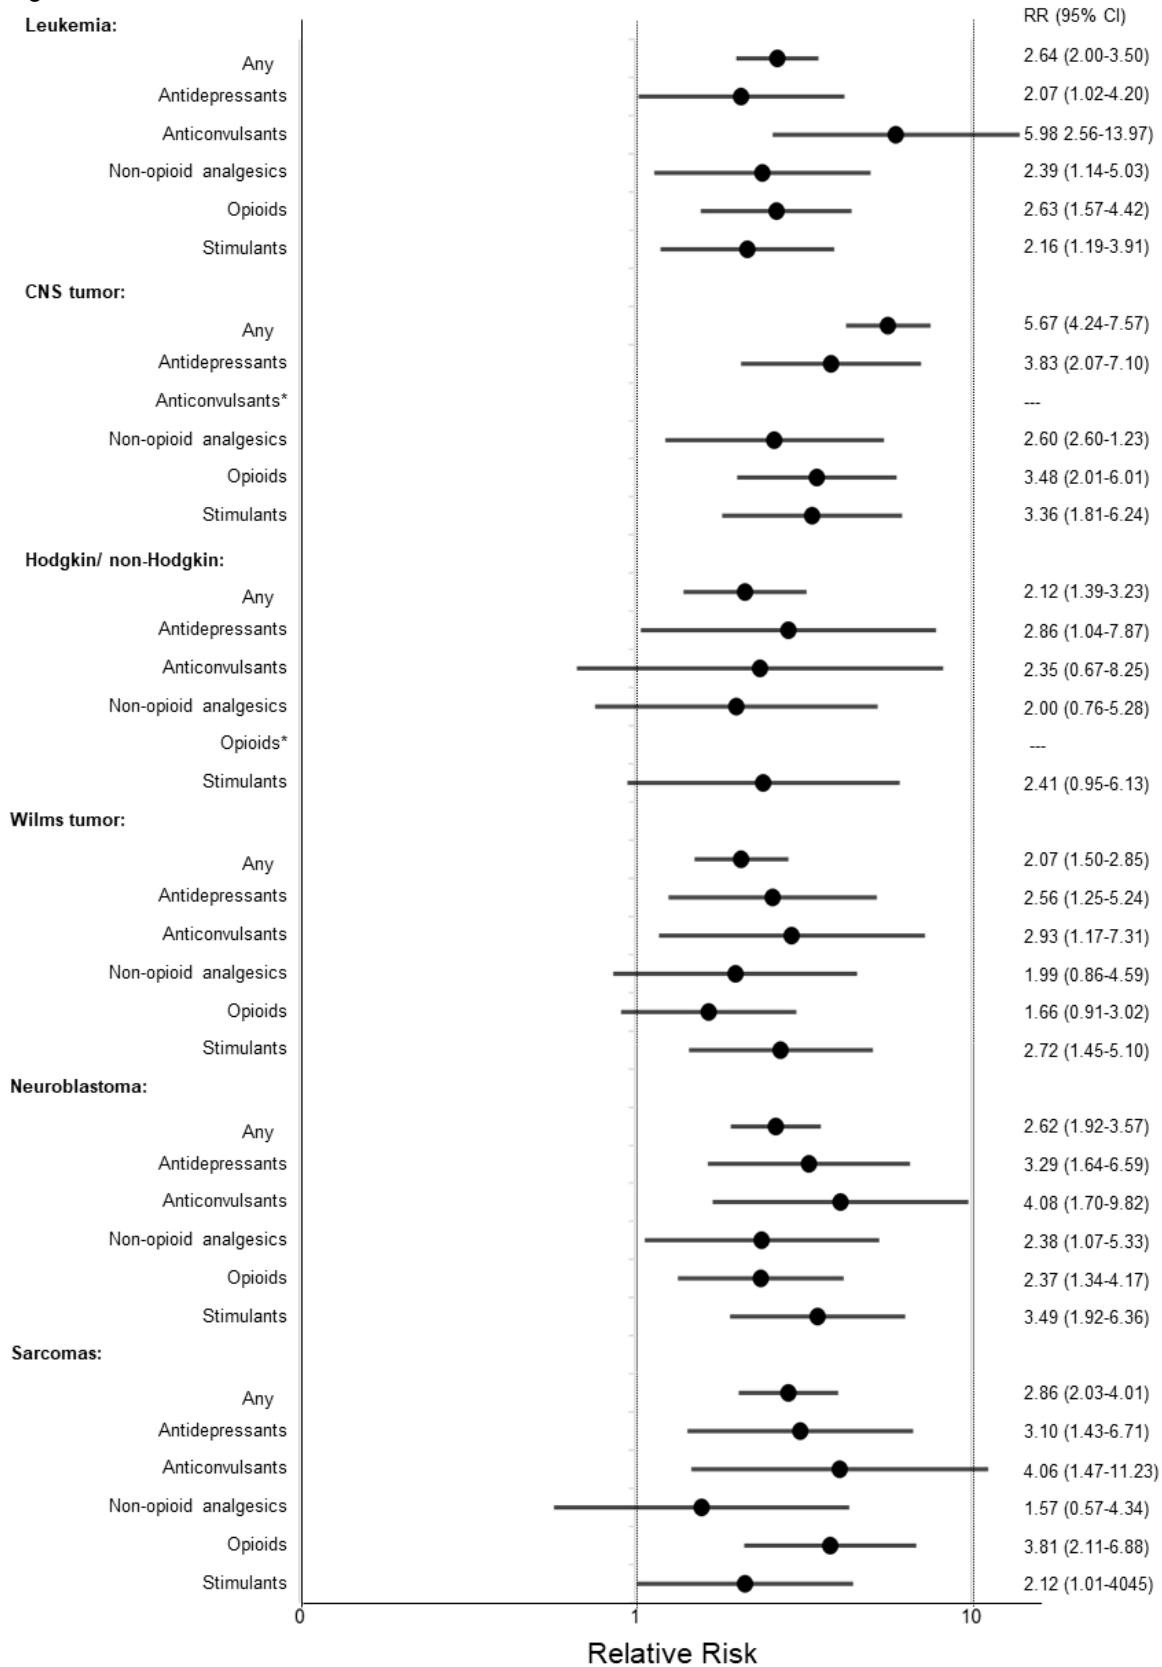



Each dot and whisker represents the relative risk (RR) estimate and 95% confidence interval (CI), respectively, on a logarithmic scale.

Models are adjusted for sex, age and race

The sarcoma group includes osteosarcoma and other soft tissue sarcomas

Risk comparisons were not conducted for Anxiolytics/Sedatives/Hypnotics, Muscle Relaxants and Neuroleptics for all diagnoses due to limited sample size within the sibling group.

\*Risk comparison was not presented graphically for Anticonvulsants within the CNS tumor group due to the large and unstable estimate (RR=30.0, 95%=13.4-67.5) obtained from the small number of individuals on psychoactive medication in the sibling group.

\*Risk comparison was not conducted for Opioids within the Hodgkin and non-Hodgkin disease group due to limited sample size within the sibling group.
